# Supplementary material
Source: PubMed Central journal article supplement (PMC2577278)
Supplement: pp.108.125187_1.pdf [file pp.108.125187_1.pdf]

## Cellular component

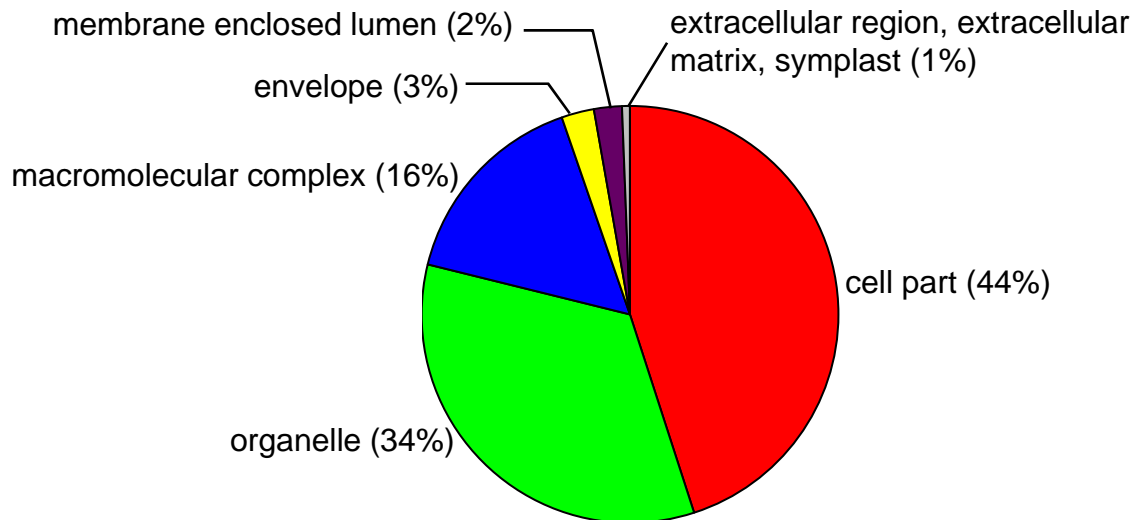

## Molecular function

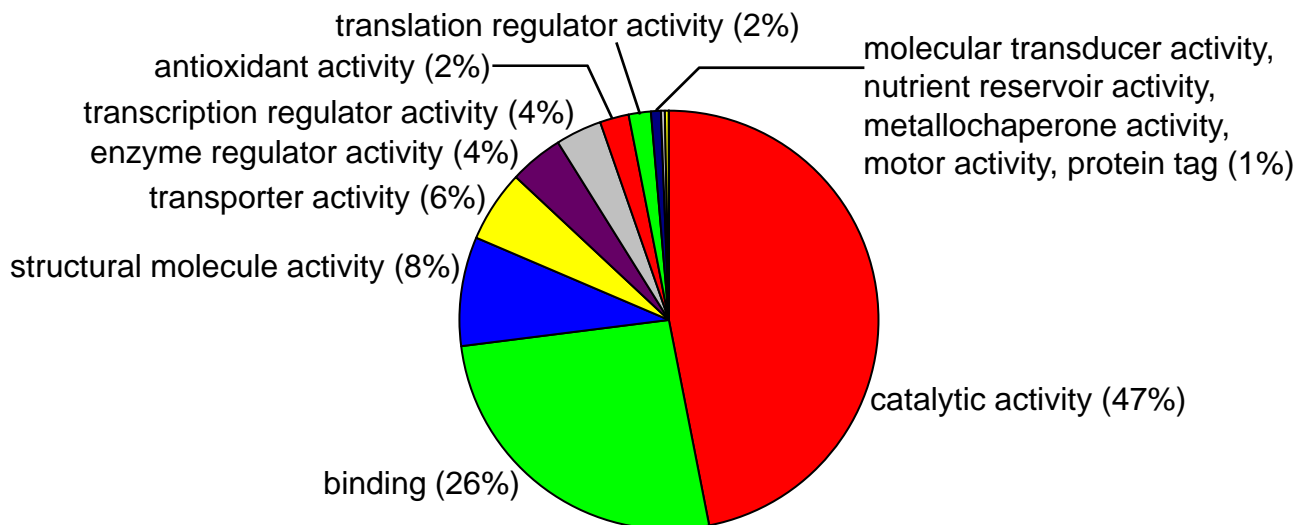

## Biological process

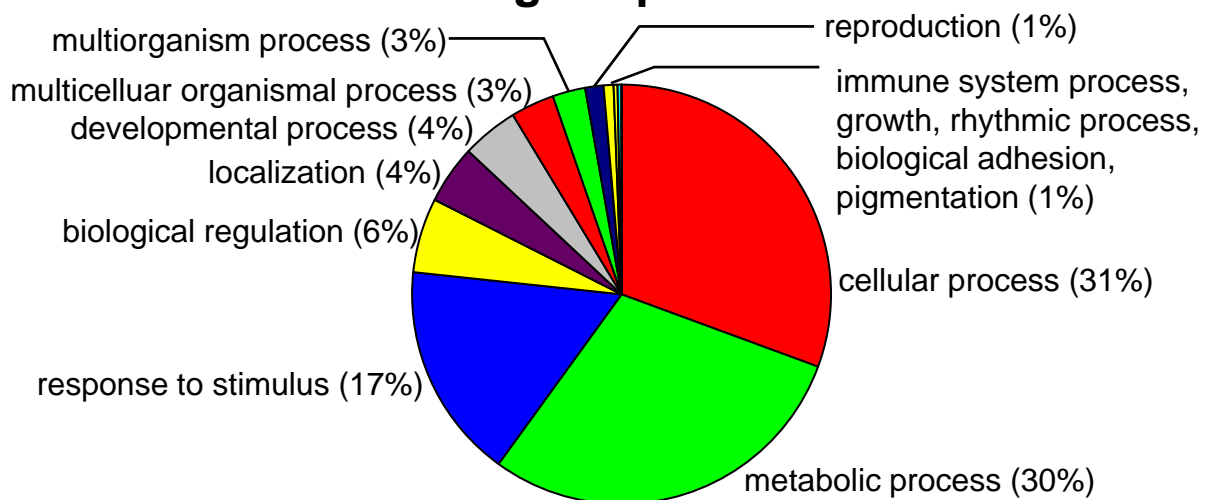

**Supplemental Figure 1.** Functional classification of the sequences in the hop glandular trichome cDNA library. Unigenes were divided into three functional categories; cellular component, molecular function and biological process, according to the gene ontology standard. The relative frequency of unigene hits in each category is indicated.
